# Supplementary material
Source: bioRxiv or medRxiv preprint supplement (https://www.biorxiv.org/highwire/filestream/44048/field_highwire_adjunct_files/3/130948-4.pdf)
Supplement: Supplementary file [file 130948-4.pdf]

# Supplementary Figure 4

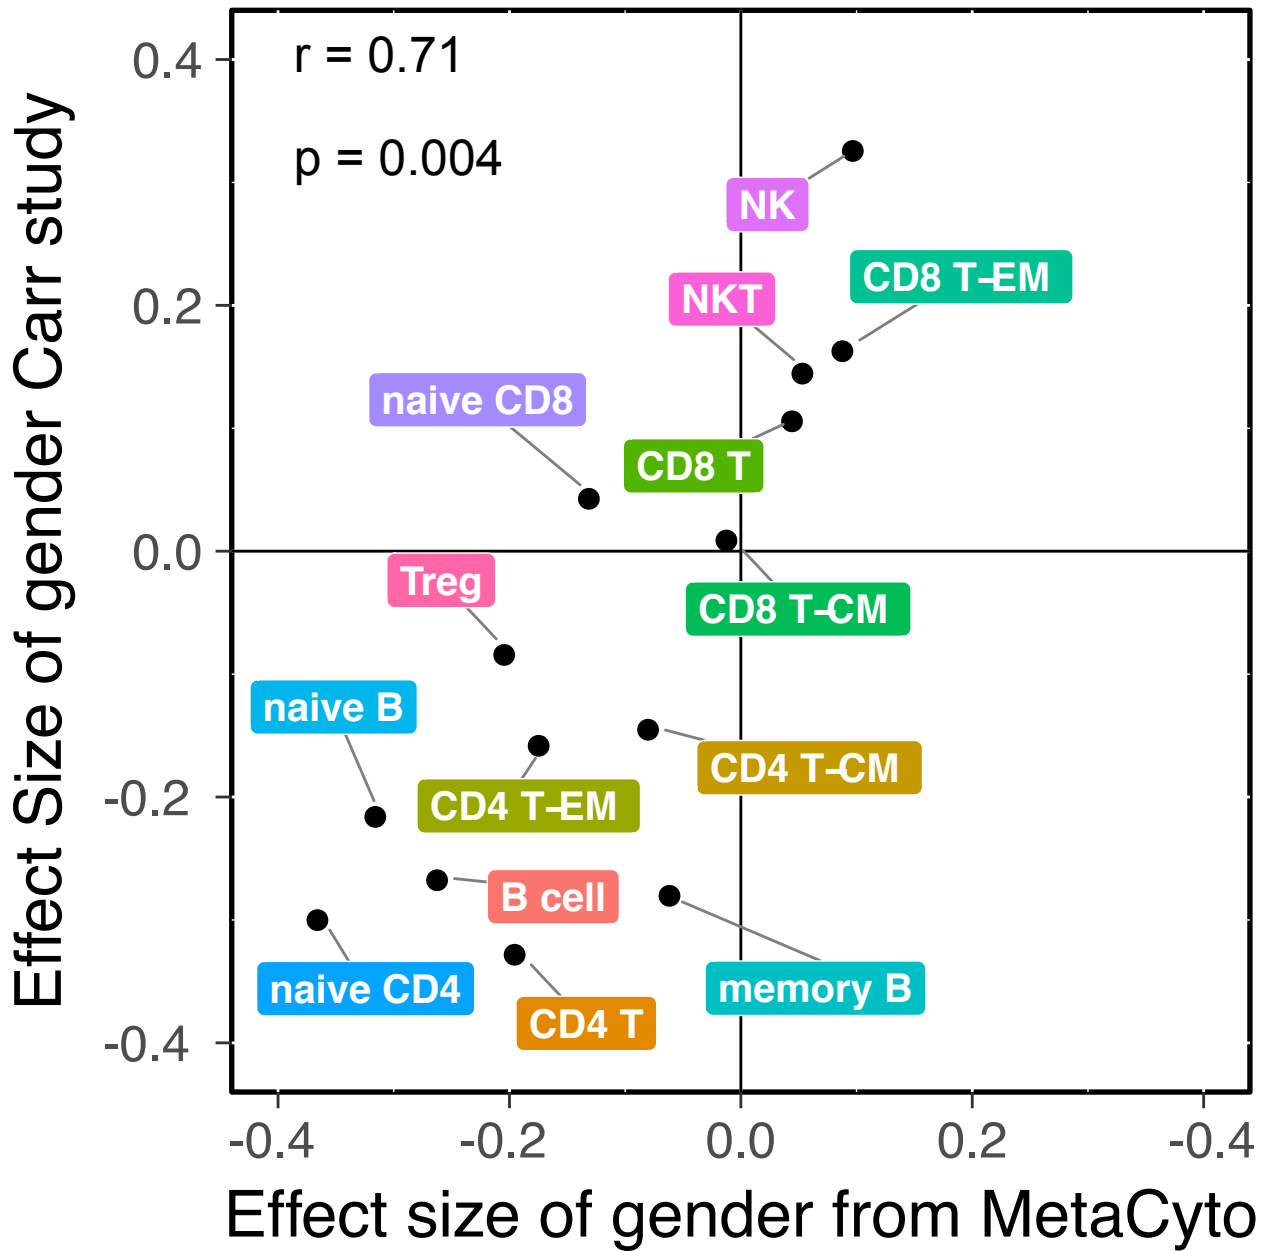

Supplementary Figure 4: Comparison between the effect sizes of gender estimated by MetaCyto using all 88 panels, against the effect size of gender estimated using the data from Carr, et al.
